# Supplementary material for: A Durable Nano-SiO2-TiO2/Dodecyltrimethoxysilane Superhydrophobic Coating for Stone Protection
Source: MDPI journal article supplement (doi:10.3390/coatings12101397), 2022-09-25
Supplement: s1 [file s1]

# Supplementary Materials: A durable nano-SiO<sub>2</sub>-TiO<sub>2</sub>/dodecyltrimethoxysilane superhydrophobic coating for stone protection

Meiman Peng <sup>1,2,3</sup>, Liqin Wang <sup>1,2,\*</sup>, Lang Guo <sup>3</sup>, Jinyi Guo <sup>3</sup>, Liping Zheng <sup>3,4</sup>, Fuwei Yang <sup>3</sup>, Zhuang Ma <sup>5</sup> and Xing Zhao <sup>3,\*</sup>

<sup>1</sup> China-Central Asia “the Belt and Road” Joint Laboratory on Human and Environment Research, Xi’an 710127, China

<sup>2</sup> Key Laboratory of Cultural Heritage Research and Conservation, Northwest University, Ministry of Education, Xi’an 710127, China

<sup>3</sup> School of Cultural Heritage, Northwest University, Xi’an 710127, China

<sup>4</sup> School of History and Society, Chongqing Normal University, Chongqing 401331, China

<sup>5</sup> Leibniz-Institut für Katalyse e.V., Albert-Einstein-Str. 29a, Rostock D-18059, Germany

\* Correspondence: wangliqinnwuedu@163.com (L.W.); zhaoxing@nwu.edu.cn (X.Z.)

## A. XRD characterization of sandstone

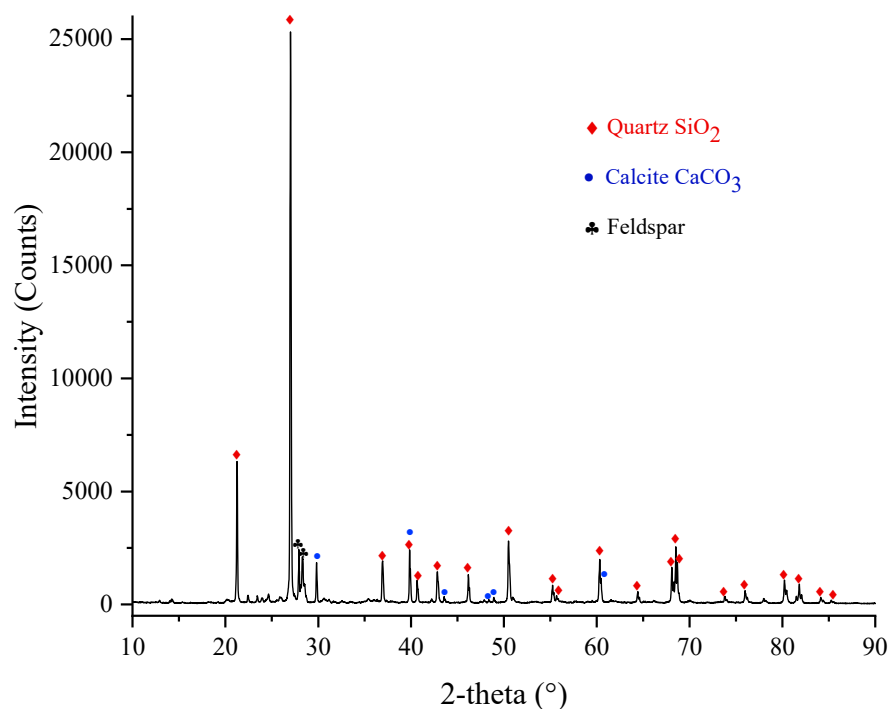

**Figure S1.** XRD pattern of sandstone used in this study.

The XRD diffractogram was recorded on an X-ray diffractometer (Bruker, D8 Advance, Karlsruhe, Germany). The intensity of radial scans for each sample was recorded using a Cu K $\alpha$  radiation which was generated at an operating voltage of 40 kV and a filament current of 40 mA.

According to the analysis, the main components of sandstone used in the experiment are quartz SiO<sub>2</sub>, calcite CaCO<sub>3</sub> and feldspar.

**Citation:** Peng, M.; Wang, L.; Guo, L.; Guo, J.; Zheng, L.; Yang, F.; Ma, Z.; Zhao, X. A Durable Nano-SiO<sub>2</sub>-TiO<sub>2</sub>/dodecyltrimethoxysilane Superhydrophobic Coating for Stone Protection. *Coatings* **2022**, *12*, 1397. <https://doi.org/10.3390/coatings12101397>

Academic Editor:  
Ioannis Karapanagiotis

Received: 30 August 2022  
Accepted: 23 September 2022  
Published: 25 September 2022

**Publisher’s Note:** MDPI stays neutral with regard to jurisdictional claims in published maps and institutional affiliations.

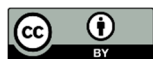

**Copyright:** © 2022 by the authors. Licensee MDPI, Basel, Switzerland. This article is an open access article distributed under the terms and conditions of the Creative Commons Attribution (CC BY) license (<https://creativecommons.org/licenses/by/4.0/>).

## B. Micromorphology of the samples

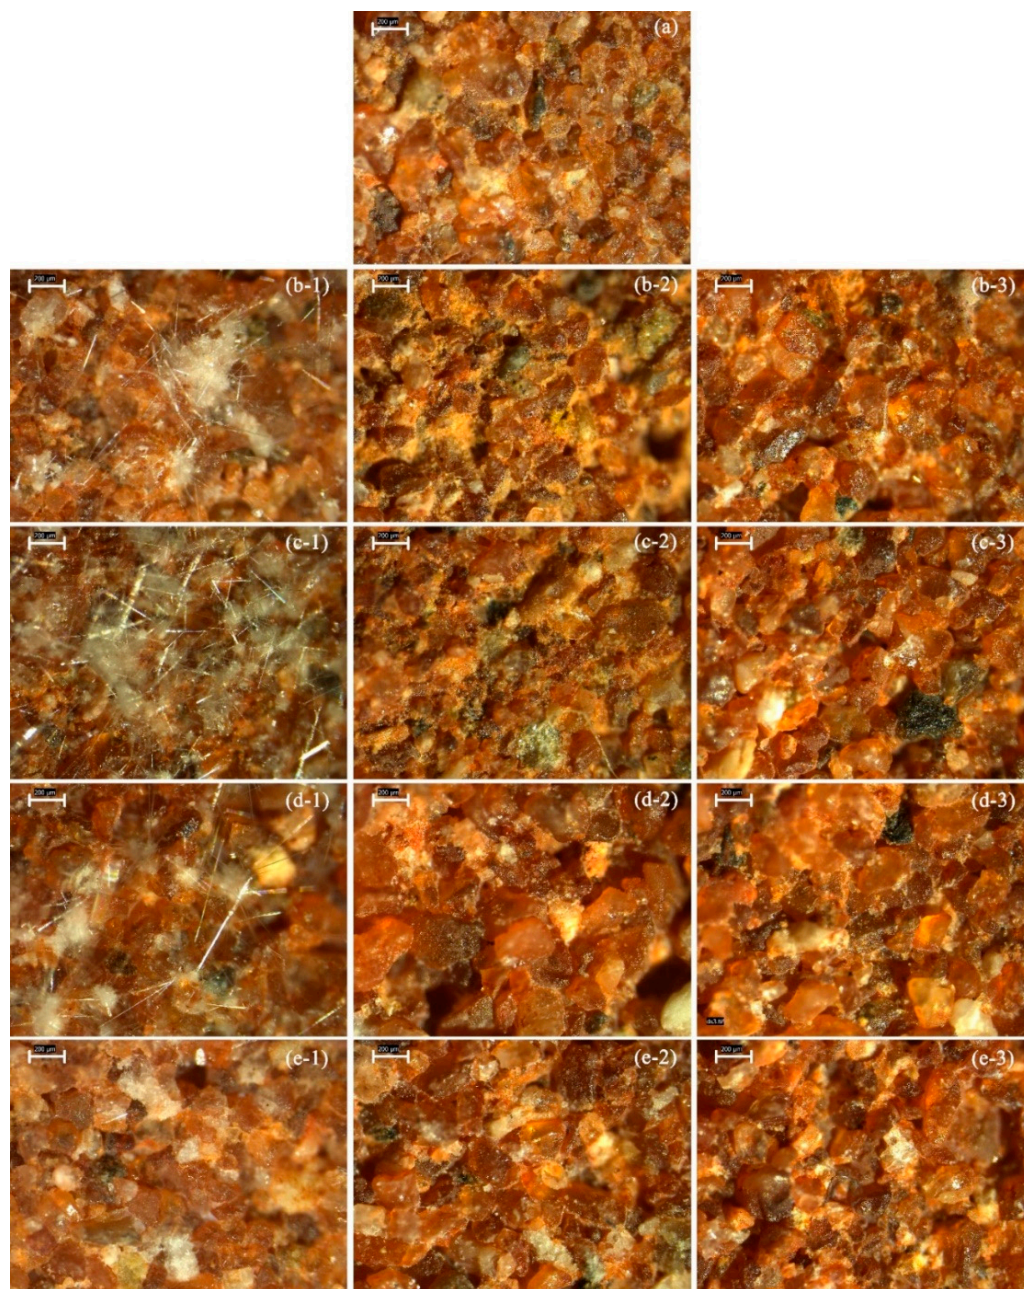

**Figure S2.** Micromorphology images of the samples tested for chemical stability. (a) S, (b) D, (c) DT, (d) DS, (e) DST. Among them, (1) for immersion in pH=1 solution, (2) for pH=7, and (3) for pH=13.

The micromorphology images were revealed on an optical microscope (Leica, S8APO, Wetzlar, Germany).

According to the images, when the samples were immersed in pH 7 or 13 solution, their micromorphology was no change basically compared to original sandstone. While samples were immersed in pH 1 solution, they were structurally damaged and there were a lot of crystals precipitated on the surfaces.
